# Supplementary material for: Whole Exome Sequencing of Highly Aggregated Lung Cancer Families Reveals Linked Loci for Increased Cancer Risk on Chromosomes 12q, 7p, and 4q
Source: Oxford University Press journal article supplement (doi:10.1158/1055-9965.epi-19-0887), 2019-12-11
Supplement: 10559965epi190887-sup-226230_2_supp_5863553_q03888.xlsx [file 10559965epi190887-sup-226230_2_supp_5863553_q03888.xlsx]

## Sheet: Sheet1
Supplementary Table S2: Genome-wide Suggestive Variants in Family 102
CHR	POS	TYPE	rsID	LCO LOD	AAC LOD	FUNC	GENE
7	149482764	SNV	rs75029939	1.8848	2.1697	syn exon	SSPO
7	149480904	Del	N/A	1.8836	2.1685	intron	SSPO
10	32111198	SNV	rs61843844	1.873	2.1537	intron	ARHGAP12
7	149484590	SNV	rs10262505	1.8322	2.117	syn exon	SSPO
7	149486081	SNV	rs11977953	1.831	2.1159	intron	SSPO
7	149485455	SNV	rs2079335	1.8299	2.1147	syn exon	SSPO
10	32327575	Del	N/A	1.7818	2.062	intron	KIF5B
7	149473261	SNV	rs73725602	1.4972	1.7813	intron	SSPO
Legend: LOD scores for Suggestive Variants for Family 102. Headers are as follows:
	CHR = chromosome
	POS = position in basepairs
	TYPE = Type of variant: single nucleotide variant (SNV), deletion (Del)
	rsID = rsID of variant (SNV only)
	LCO LOD = LOD score for Family 102 for lung cancer only (LCO) analysis
	AAC LOD = LOD score for Family 102 for all aggregated cancer (AAC) analysis
	FUNC = Function of the variant: syn exon (synonymous exonic) or intron (intronic)
	GENE = Gene location of variant
