# Supplementary material for: Whole Exome Sequencing of Highly Aggregated Lung Cancer Families Reveals Linked Loci for Increased Cancer Risk on Chromosomes 12q, 7p, and 4q
Source: Oxford University Press journal article supplement (doi:10.1158/1055-9965.epi-19-0887), 2019-12-11
Supplement: 10559965epi190887-sup-226230_2_supp_5865681_q054jy.pdf [file 10559965epi190887-sup-226230_2_supp_5865681_q054jy.pdf]

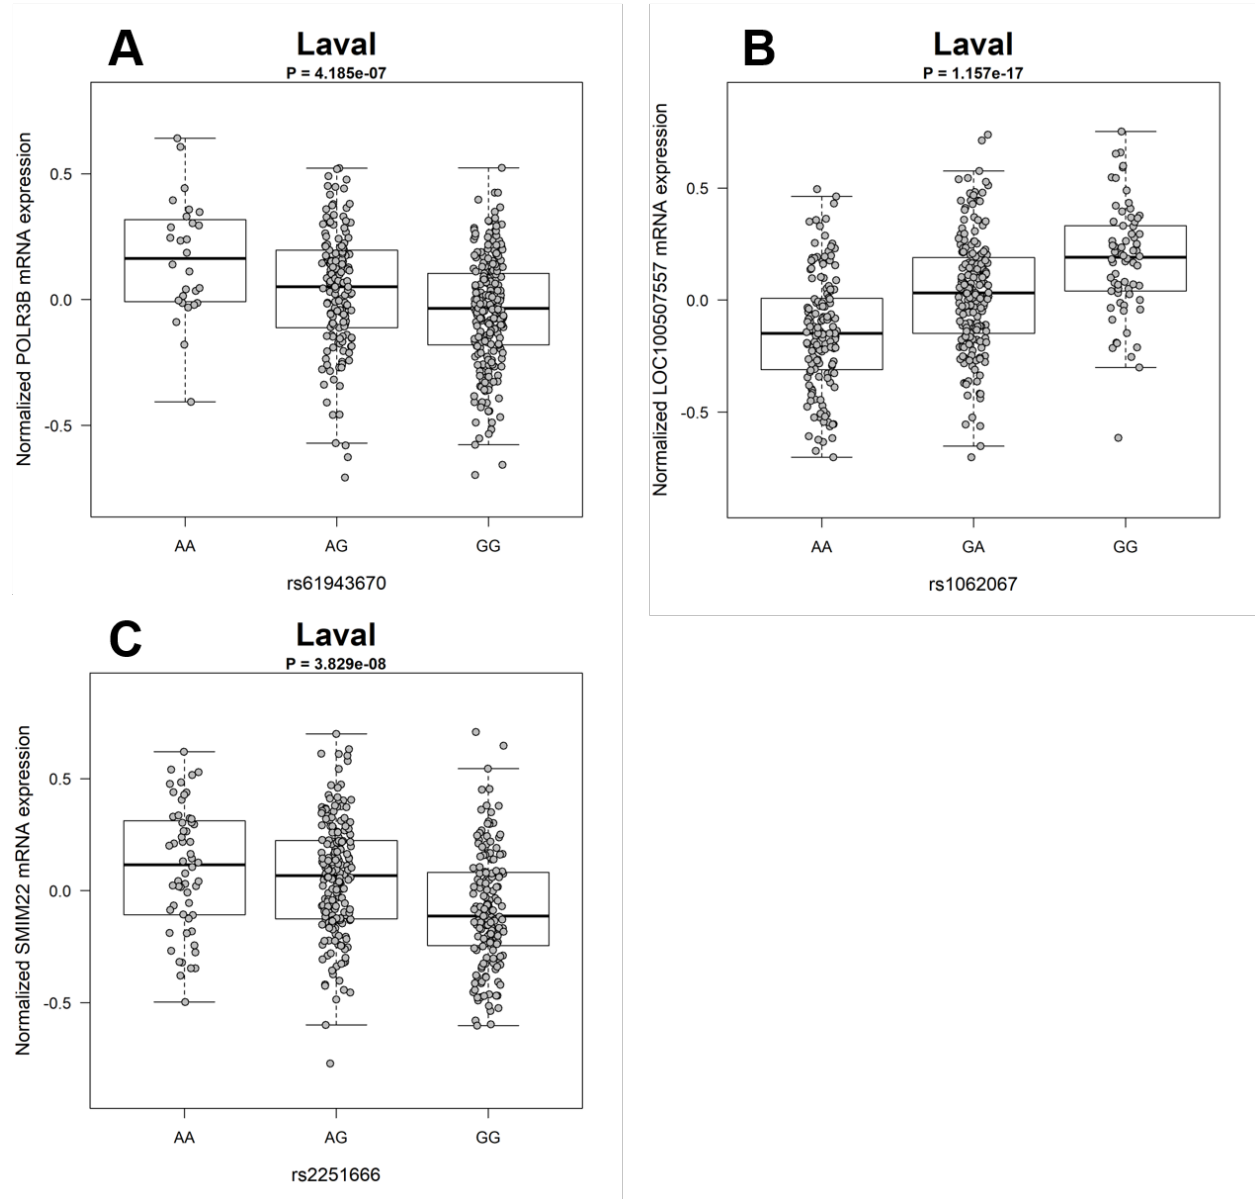

**Supplementary Figure S3:** eQTL boxplot showing mRNA expression in the lung for selected variants. A) rs61943670, an intronic variant in *POLR3B* at 12q23.3, B) rs1062067, a variant located in the noncoding RNA gene *LOC100507557* at 6q24.3 and C) rs1062067, an intronic variant located in *UBN1* but found to control the nearby upstream gene *SMIM22*, both located at 16p13.3.
